# Supplementary material for: Changes in the Arabidopsis thaliana Proteome Implicate cAMP in Biotic and Abiotic Stress Responses and Changes in Energy Metabolism
Source: Int J Mol Sci. 2016 Jun 1;17(6):852. doi: 10.3390/ijms17060852 (PMC4926386; doi:10.3390/ijms17060852)
Supplement: Supplementary file 1 [file ijms-17-00852-s001.xlsx]

## Sheet: Table S1
Table S1. Proteins involved in energy metabolism post cAMP treatment.
		5 Min		10 Min
Accession Number	Protein Name	Fold Change	p-Value	Fold Change	p-Value
TCA cycle associated proteins
AT4G37870	Phosphoenolpyruvate carboxykinase 1	5.30239	0.186511
AT2G05710	Aconitase 3	8.05507	0.138189	10.9427	0.219017
AT1G04410	Lactate/malate dehydrogenase family protein	7.05328	0.166611	-0.637133	0.140004
AT2G20420	ATP citrate lyase family protein	10.5619	0.135069	1.13877	0.181382
AT3G27380	Succinate dehydrogenase 2-1	11.875	0.117073	2.08127	0.51647
AT1G65930	Cytosolic NADP+-dependent isocitrate dehydrogenase	6.33037	0.515828	17.09	0.982689
AT1G20450	Early response to dehydration 10 (ERD10)	0.97085	0.0424527	8.70187	0.177361
AT5G50850	Transketolase family protein			0.6636	0.0852782
AT3G13930	Dihydrolipoamide acetyltransferase			13.5983	0.185943
AT1G53240	Lactate/malate dehydrogenase family protein			0.84575	0.0393058
Glycolysis associated proteins
AT1G23190	Phosphoglucomutase/phosphomannomutase family protein	1.4067	0.137855	-0.6675	0.083218
AT3G52930	Aldolase superfamily protein	1.0128	0.0536851	-0.601719	0.225303
AT2G36460	Aldolase superfamily protein	2.38354	0.311729	-0.031471	0.0233322
AT1G13440	Glyceraldehyde-3-phosphate dehydrogenase C2	5.86147	0.18618
AT2G01140	Aldolase superfamily protein	3.53231	0.0147255	0.790717	0.446909
AT1G79530	Glyceraldehyde-3-phosphate dehydrogenase of plastid 1	-1.08526	0.471952	1.60156	0.321885
AT4G25900	Galactose mutarotase-like superfamily protein	-1.06978	0.477419	-1.34879	0.423179
AT3G12780	Phosphoglycerate kinase 1	0.7554	0.170221
AT1G79550	Phosphoglycerate kinase	0.69695	0.157791	-0.33345	0.103705
AT3G04120	Glyceraldehyde-3-phosphate dehydrogenase C1	16.0592	0.158913
AT4G17260	Lactate/malate dehydrogenase family protein	-1.25269	0.427914	1.86287	0.33165
AT4G37870	Phosphoenolpyruvate carboxykinase 1	5.30239	0.186511
AT1G08110	Glyoxalase I protein	-0.6505	0.00911759	0.5278	0.0236882
AT3G13930	Dihydrolipoamide acetyltransferase, long form protein			13.5983	0.185943
AT5G50850	Transketolase family protein			0.6636	0.0852782
AT1G70730	Phosphoglucomutase/phosphomannomutase family protein			-0.603072	0.295082
AT2G21170	Triosephosphate isomerase			-0.22212	0.25582
Cells highlighted in grey indicate corresponding proteins that were not considered for further analysis in this study.
